# Supplementary material
Source: publisher site journal article supplement (https://www.dovepress.com/article/450934)
Supplement: Supplementary file 1 [file get_supplementary_file.php]

Table S1 Experiment Materials

| **Material**  **Number** | **Belonging Experiment** | **Material Type** | **Content of Experimental Materials** |
| --- | --- | --- | --- |
| 1 | Experiment 1a | High information quality, Positive valence | Moderate acute stress, meaning stress that lasts for a short duration, is beneficial and brings two advantages:  (1) A smarter and sharper mind. This is because the essence of stress is a form of exercise for the brain. Appropriate stress can make a person more focused, more diligent, and quicker in responding when facing problems;  (2) More positive emotions, namely happiness. The essence here is that by exerting effort, dopamine secretion is stimulated, activating the reward circuit and enabling the brain to receive rewards. A core feature of dopamine secretion is known as the “reward prediction error effect”: what determines the intensity of the reward is not the benefit of the action itself but the difference between the “expected benefit” and the “actual benefit. |
| 2 | Experiment 1a | High information quality、Negative valence | I don’t know when it started, but suddenly I began to lose much hair. I find myself getting irrationally irritated over small things, constantly forgetting stuff, and my skin has become sensitive and terrible. What’s more frightening is:  (1) Under the onslaught of stress, the brain’s structure can also change. I keep forgetting things and feel dazed every day, and chronic issues like migraines, back pain, and hair loss have become a problem, even leading to mental illnesses like anxiety and depression.  (2) Some invisible stress doesn’t manifest in physical symptoms but changes our behavior. In our despondency, we easily fall into a swamp – a negative stress cycle. The unresolved, long-term stress affects our lives, causing work, health, and relationships to deteriorate further, generating even more stress. |
| 3 | Experiment 1a、1b | Low information quality、Positive valence | This allows our body to better fight disease and reduce inflammation. It is offered in the Faculty of Philosophy, Logic and Scientific Method. Sustained short-term stress can reduce the risk of mental illness, improve personal resilience, reduce their risk of mental illness, and better cope with difficult situations. can make people work harder, be more responsive, and improve immunity when facing problems. |
| 4 | Experiment 1a、1b | Low information quality、Negative valence | Now people’s lives are only an empty shell but they can’t find a direction at all, and they are burdened with the pressure of various identities, but none of them can live for themselves. Literally, after the name change of the major, it is obvious that economics is emphasized, and we do repetitive and boring work day, unable to find a sense of meaning in life. |
| 5 | Experiment 2 | Low information quality、Positive valence | Arriving in Mexico City was filled with fear of the unknown, because of the news that people were in Mexico throughout May, studying water purification in remote areas and. With the grandeur of history and the warmth of the streets, I was shocked by the city, and the two wet puppies and the moment of running to the strange, I very warm. |
| 6 | Experiment 2 | Low information quality、Negative valence | Many netizens do not pay attention to the incident itself, but speculate about her, but the consequences of cyberbullying need to be compensated with even their lives. was and killed by a teacher’s car on the school premises, and then the mother endured not only the heartache of losing her child, but also the victim’s mother reportedly jumped to her death due to cyberbullying. |
